# Supplementary material
Source: Research Square preprint supplement (doi:10.21203/rs.3.rs-9141481/v1)
Supplement: Supplementary file 1 [file 599136a6379d466facd7b59f.docx]

PRISMA-P (2015) Checklist

Recommended items to address in a systematic review protocol

ADMINISTRATIVE INFORMATION

• Title (Item 1a): Identify the report as a protocol of a systematic review.

Reported on: Title Page

• Title (Item 1b): If the protocol is for an update of a previous review, identify as such.

Reported on: N/A

• Registration (Item 2): If registered, provide the name of the registry (e.g., PROSPERO) and registration number.

Reported on: Page 1 (Abstract)

• Authors (Item 3a): Provide name, institutional affiliation, and e-mail address of all protocol authors.

Reported on: Title Page

• Authors (Item 3b): Describe contributions of protocol authors.

Reported on: Declarations

• Support (Item 5a): Indicate sources of financial or other support for the review.

Reported on: Declarations (Funding)

• Support (Item 5b): Provide name for the funder/sponsor.

Reported on: Declarations (Funding)

• Support (Item 5c): Describe roles of funder/sponsor.

Reported on: Declarations (Funding)

INTRODUCTION

• Rationale (Item 6): Describe the rationale for the review in the context of what is already known.

Reported on: Section 1.1

• Objectives (Item 7): Provide an explicit statement of the question(s) the review will address with reference to participants, interventions, comparators, and outcomes (PICO).

Reported on: Section 1.2

METHODS

• Eligibility criteria (Item 8): Specify the study characteristics (e.g., PICO, study design, setting, time frame) and report characteristics (e.g., years considered, language, publication status) to be used as criteria for eligibility.

Reported on: Section 2.1

• Information sources (Item 9): Describe all intended information sources (e.g., electronic databases, contact with study authors, trial registers) with planned dates of coverage.

Reported on: Section 2.2

• Search strategy (Item 10): Present draft of search strategy to be used for at least one electronic database, including planned limits.

Reported on: Section 2.2

• Study records - Data management (Item 11a): Describe the mechanism(s) that will be used to manage records and data throughout the review.

Reported on: Section 2.3

• Study records - Selection process (Item 11b): State the process that will be used for selecting studies (e.g., two independent reviewers) through each phase of the review.

Reported on: Section 2.3

• Study records - Data collection process (Item 11c): Describe method of extracting data from reports (e.g., piloting forms, done independently, in duplicate).

Reported on: Section 2.3

• Data items (Item 12): List and define all variables for which data will be sought (e.g., PICO items, funding sources).

Reported on: Section 2.3

• Outcomes (Item 13): List and define all outcomes for which data will be sought, including prioritization of main and additional outcomes.

Reported on: Section 2.1

• Risk of bias (Item 14): Describe anticipated methods for assessing risk of bias of individual studies.

Reported on: Section 2.4

• Data synthesis (Item 15a): Describe criteria under which study data will be quantitatively synthesized.

Reported on: Section 2.5

• Data synthesis (Item 15b): If data are appropriate for synthesis, describe planned summary measures, methods of handling data, and methods of combining data from studies.

Reported on: Section 2.5

• Data synthesis (Item 15c): Describe any proposed additional analyses (e.g., sensitivity or subgroup analyses, meta-regression).

Reported on: N/A

• Data synthesis (Item 15d): If quantitative synthesis is not appropriate, describe the type of summary planned.

Reported on: Section 2.5

• Meta-bias(es) (Item 16): Specify any planned assessment of meta-bias(es) (e.g., publication bias across studies).

Reported on: N/A

• Confidence in evidence (Item 17): Describe how the strength of the body of evidence will be assessed (e.g., GRADE).

Reported on: Section 2.5
